# Supplementary material for: Natural tea polyphenol functionalized graphene anode for simultaneous power production and degradation of methyl orange dye in microbial fuel cells
Source: Royal Society of Chemistry journal article supplement (doi:10.1039/d4ra00613e), 2024-01-01
Supplement: d4ra00613e1.pdf [file d4ra00613e1.pdf]

## Supporting Materials

**Natural tea polyphenol functionalized graphene anode for simultaneous power production and degradation of methyl orange dye in microbial fuel cells**

Deliang Guo <sup>a</sup>, Qikai Fu <sup>a, §</sup>, Xinru Wang <sup>a</sup>, Ling Li <sup>a</sup>, Xiaolin Xu <sup>a\*</sup>, Xiongfang An <sup>a\*</sup>

<sup>a</sup> School of Chemistry and Chemical Engineering/Key Laboratory of Environmental Monitoring and Pollutant Control, Shihezi University, Shihezi 832003, China

§ These authors contributed equally to this work.

\* Corresponding authors:

Xiaolin Xu. Email address: [xuxl@shzu.edu.cn](mailto:xuxl@shzu.edu.cn)

Xiongfang An. Email address: [shz\\_anxiongfang@163.com](mailto:shz_anxiongfang@163.com)

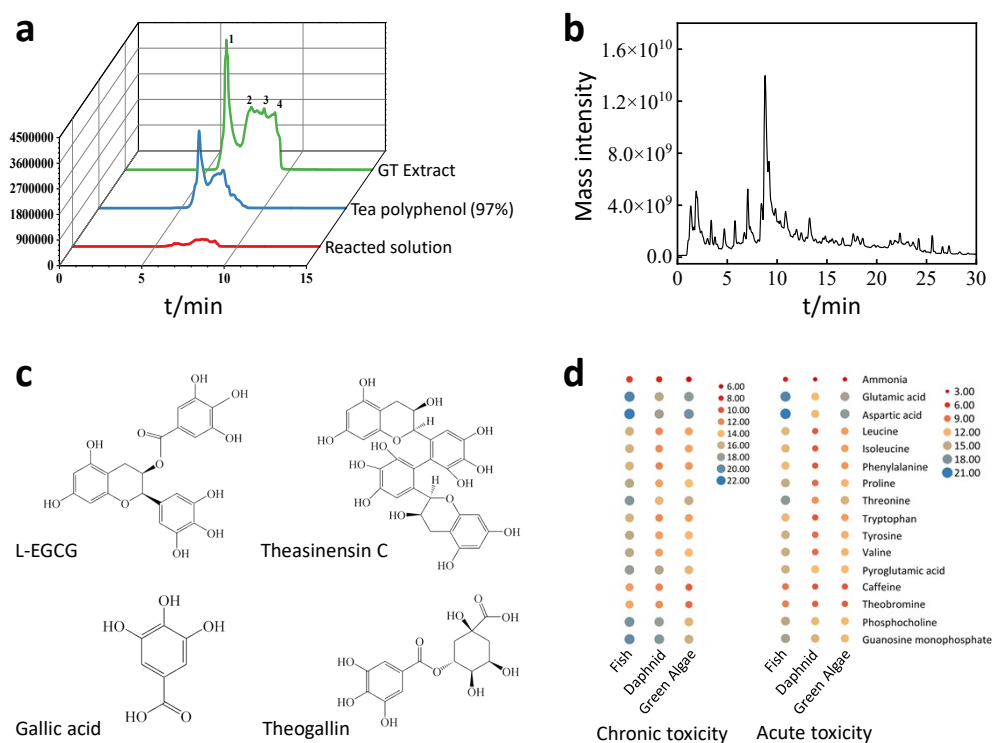

**Fig. S1** (a) HPLC analysis diagram (1. L-EGCG; 2. Theasinensin C; 3. Gallic acid; 4. Theogallin); (b) Total ion current (TIC) chromatogram of the green tea extracts by UHPLC-Q-Exactive/MS; (c) Molecular structural formulae of the four main components of green tea extracts; (d) Toxicological data pertains to the impurities found in green tea extracts.

**Table S1.** Information on compounds identified in green tea extracts.

| Compound        | Retention time | Mass-to-charge ratio |           | Compound name            | Formula                                         |
|-----------------|----------------|----------------------|-----------|--------------------------|-------------------------------------------------|
|                 |                | Theoretical          | Measured  |                          |                                                 |
| Tea polyphenols | 10.823         | 290.0785             | 291.0858  | Epicatechin              | C <sub>15</sub> H <sub>14</sub> O <sub>6</sub>  |
|                 | 13.608         | 306.0735             | 289.0702  | (-)-Epigallocatechin     | C <sub>15</sub> H <sub>14</sub> O <sub>7</sub>  |
|                 | 9.625          | 458.0844             | 459.0917  | Epigallocatechin gallate | C <sub>22</sub> H <sub>18</sub> O <sub>11</sub> |
|                 | 6.268          | 306.0734             | 307.0807  | Gallocatechin            | C <sub>15</sub> H <sub>14</sub> O <sub>7</sub>  |
|                 | 8.487          | 290.0782             | 291.08548 | Catechin                 | C <sub>15</sub> H <sub>14</sub> O <sub>6</sub>  |
|                 | 3.783          | 610.1321             | 611.1393  | Theasinensin C           | C <sub>30</sub> H <sub>26</sub> O <sub>14</sub> |
|                 | 7.935          | 730.1533             | 731.1606  | Procyanidin B2 3'-       | C <sub>37</sub> H <sub>30</sub> O <sub>16</sub> |

|                |        |           |           |                            |                                                                 |
|----------------|--------|-----------|-----------|----------------------------|-----------------------------------------------------------------|
|                |        |           |           | O-gallate                  |                                                                 |
|                | 2.456  | 170.0213  | 171.0286  | Gallic acid                | C <sub>7</sub> H <sub>6</sub> O <sub>5</sub>                    |
|                | 1.366  | 192.0631  | 193.0704  | Quinic acid                | C <sub>7</sub> H <sub>12</sub> O <sub>6</sub>                   |
|                | 4.036  | 344.0739  | 345.0811  | Theogallin                 | C <sub>14</sub> H <sub>16</sub> O <sub>10</sub>                 |
| Amino<br>acids | 10.515 | 336.0818  | 337.0891  | Chlorogenic acid           | C <sub>16</sub> H <sub>18</sub> O <sub>9</sub>                  |
|                | 1.268  | 147.0529  | 180.0863  | Glutamic acid              | C <sub>5</sub> H <sub>9</sub> NO <sub>4</sub>                   |
|                | 1.233  | 133.0374  | 134.0447  | Aspartic acid              | C <sub>4</sub> H <sub>7</sub> NO <sub>4</sub>                   |
|                | 23.934 | 131.0946  | 132.1019  | Leucine                    | C <sub>6</sub> H <sub>13</sub> NO <sub>2</sub>                  |
|                | 2.99   | 131.0945  | 132.1018  | Isoleucine                 | C <sub>6</sub> H <sub>13</sub> NO <sub>2</sub>                  |
|                | 7.842  | 165.0789  | 166.0862  | Phenylalanine              | C <sub>9</sub> H <sub>11</sub> NO <sub>2</sub>                  |
|                | 3.522  | 115.0634  | 116.0707  | Proline                    | C <sub>5</sub> H <sub>9</sub> NO <sub>2</sub>                   |
|                | 2.107  | 119.0583  | 120.0656  | Threonine                  | C <sub>4</sub> H <sub>9</sub> NO <sub>3</sub>                   |
|                | 6.673  | 204.0896  | 188.0703  | Tryptophan                 | C <sub>11</sub> H <sub>12</sub> N <sub>2</sub> O <sub>2</sub>   |
|                | 7.666  | 181.0737  | 182.0811  | Tyrosine                   | C <sub>9</sub> H <sub>11</sub> NO <sub>3</sub>                  |
|                | 1.762  | 117.0791  | 118.0863  | Valine                     | C <sub>5</sub> H <sub>11</sub> NO <sub>2</sub>                  |
|                | 5.609  | 129.0426  | 130.0499  | Pyroglutamic acid          | C <sub>5</sub> H <sub>7</sub> NO <sub>3</sub>                   |
| Other          | 5.386  | 194.08024 | 195.08752 | Caffeine                   | C <sub>8</sub> H <sub>10</sub> N <sub>4</sub> O <sub>2</sub>    |
|                | 7.28   | 180.06447 | 181.07175 | Theobromine                | C <sub>7</sub> H <sub>8</sub> N <sub>4</sub> O <sub>2</sub>     |
|                | 4.061  | 183.0656  | 184.07321 | Phosphocholine             | C <sub>5</sub> H <sub>14</sub> NO <sub>4</sub> P                |
|                | 1.754  | 363.0573  | 364.06458 | Guanosine<br>monophosphate | C <sub>10</sub> H <sub>14</sub> N <sub>5</sub> O <sub>8</sub> P |

**Text1:** The components of the green tea extracts were determined using a high performance liquid chromatography system (HPLC , LC-2030 Plus, Shimadzu). A Shimadzu, shim-pack packed column with dimensions of 4.6\*250 mm was utilized for the chromatographic separation. The mobile phase consisted of two components: mobile phase A, which consisted of a methanol- 0.01 % phosphoric acid solution, and mobile phase B, which was pure methanol. The separation was carried out using a

gradient elution program at a flow rate of 1 mL·min<sup>-1</sup>. The column temperature was maintained at 30°C, and an injection volume of 20 µL was used. The detection of the components was performed at an ultraviolet wavelength of 278 nm. The standard solution used for calibration purposes was prepared using Tea Polyphenol Reagent (97%; Shanghai Macklin Biochemical Co., Ltd.).

The HPLC analysis in **Fig. S1** demonstrates that the green tea extracts is abundant in tea polyphenols, particularly catechins, as compared to the tea polyphenol standard (97%). Based on previous research, it has been deduced that green tea extracts contains various constituents, including L-EGCG, theasinensin C, gallic acid, theogallin <sup>1,2</sup>, with L-EGCG being among the primary compounds identified. Following the reaction of reducing graphene oxide, the green tea extracts experienced a significant decrease in tea polyphenol content. Particularly, the L-EGCG content exhibited a more pronounced decrease, indicating that not only did green tea extracts contribute to the reduction process of graphene oxide, but the L-EGCG played a crucial role in this reduction process. By considering the changes observed in functional groups during infrared analysis, it can be inferred that the decrease in tea polyphenol content may be associated with the binding of biomolecules with RGO during the reduction of graphene oxide. The extraction process used water as the extraction solvent. The remaining water insoluble components are dehydrated to obtain green tea residue. As reported in the literature, the components in green tea residue are also rich in polysaccharides, proteins and fat-soluble vitamins, etc. Assuming the tea residue can be further processed into reusable values, it would not only protect the environment but also beneficially contribute to the high-value utilisation of green tea residue <sup>3,4</sup>.

**Text2:** The determination was conducted using ultra performance liquid chromatography and quadrupole-electrostatic orbitrap mass spectrometry (UHPLC-Q-Exactive/MS, Thermo Scientific UltiMate 3000 HPLC). Chromatographic conditions included a mobile phase A consisting of 0.1% formic acid in water, and phase B

comprising methanol. The injection volume was 3  $\mu\text{L}$ , the flow rate was 0.4  $\text{mL} \cdot \text{min}^{-1}$ , and the column temperature was maintained at 40°C. The mobile phase was eluted using a linear gradient. For mass spectrometry, electrospray ionization (ESI) was employed with scanning in positive ion mode. The capillary voltage was set at 3,500 V, and the drying gas temperature and flow rate were 300°C and 8  $\text{L} \cdot \text{min}^{-1}$ , respectively. The nebulizing gas pressure was maintained at 35 psi, while the sheath gas temperature and flow rate were 300°C and 11  $\text{L} \cdot \text{min}^{-1}$ , respectively. Mass spectrometry scanning was conducted over a mass-to-charge ratio ( $m/z$ ) range of 100~1,000. In the green tea extracts, the identified compounds are presented in **Table S1**. Among these, amino acid compounds were identified as the main components of impurities in green tea extracts.

The purity of the tea polyphenols was determined to be 27.64% using the ferrous tartrate method <sup>5</sup>. The toxicological data of impurities in green tea extracts are depicted in **Fig. S1 (d)**. In the toxicological data for the reducing agent ammonia, high toxicity to fish, daphnid, and green algae was observed even at lower concentrations, indicating significant toxicity. Compared to ammonia, amino acids exhibited better organism survival at higher concentrations, indicating lower toxicity. This suggests that the green tea extracts used as a reducing agent can effectively reduce the use of toxic reagents in the preparation process and minimize environmental side effects. Additionally, it is less toxic to microorganisms and promotes excellent biocompatibility of the anode.

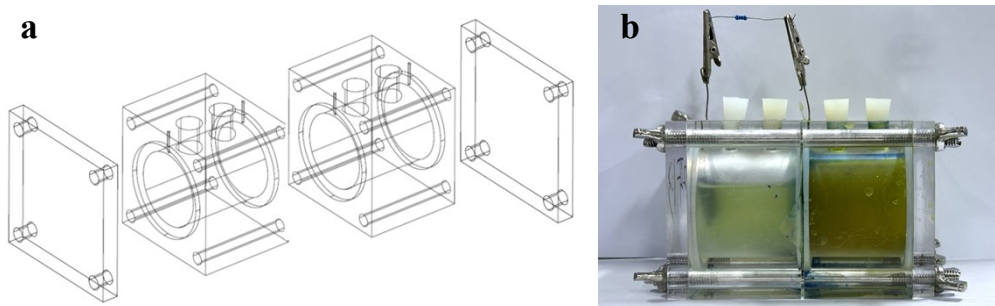

**Fig. S2** (a) MFC structure design sketch; (b) Physical drawing of MFC device.

**Table S2.** Concentrations of vitamins in solution added to inoculum.

| Composition         | mg·L <sup>-1</sup> |
|---------------------|--------------------|
| Biotin              | 2                  |
| Folic acid          | 2                  |
| Pyridoxine HCl      | 10                 |
| Riboflavin          | 5                  |
| Thiamin             | 5                  |
| Nicotinic acid      | 5                  |
| Pantothenic acid    | 5                  |
| B-12                | 0.1                |
| P-aminobenzoic acid | 5                  |
| Thioctic acid       | 5                  |

**Table S3.** Concentrations of trace element solution in solution added to inoculum.

| Composition                                            | g·L <sup>-1</sup> |
|--------------------------------------------------------|-------------------|
| NTA                                                    | 1.5               |
| MgSO <sub>4</sub>                                      | 3                 |
| MnSO <sub>4</sub> ·H <sub>2</sub> O                    | 0.5               |
| NaCl                                                   | 1                 |
| FeSO <sub>4</sub> ·7H <sub>2</sub> O                   | 0.1               |
| CaCl <sub>2</sub> ·2H <sub>2</sub> O                   | 0.1               |
| CoCl <sub>2</sub> ·6H <sub>2</sub> O                   | 0.1               |
| ZnCl <sub>2</sub>                                      | 0.13              |
| CuSO <sub>4</sub> ·5H <sub>2</sub> O                   | 0.01              |
| AlK(SO <sub>4</sub> ) <sub>2</sub> ·12H <sub>2</sub> O | 0.01              |
| H <sub>3</sub> BO <sub>3</sub>                         | 0.01              |
| Na <sub>2</sub> MoO <sub>4</sub>                       | 0.025             |
| NiCl <sub>2</sub> ·6H <sub>2</sub> O                   | 0.024             |
| Na <sub>2</sub> WO <sub>4</sub> ·2H <sub>2</sub> O     | 0.025             |

**Table S4.** The gradient elution procedure

| Samples   | $R_s(\Omega)$ | $R_{ct}(\Omega)$ |
|-----------|---------------|------------------|
| CC        | 43.3          | 235.4            |
| RGO@CC    | 50.2          | 49.5             |
| TP-RGO@CC | 52.0          | 14.6             |

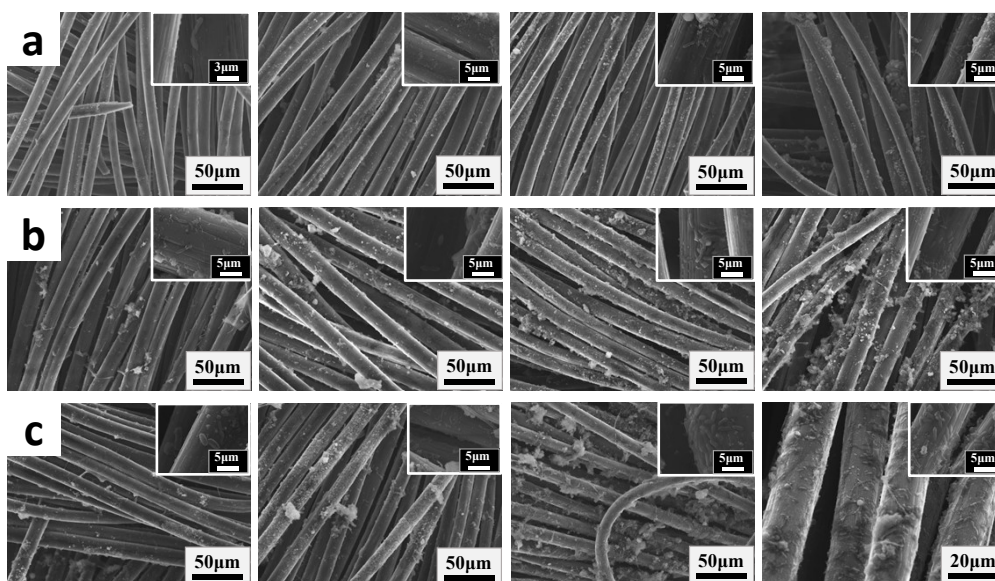

**Fig. S3** SEM images of biofilm growth on (a) CC, (b) RGO@CC and (c) TP-RGO@CC anodes (Each set of graphs from left to right is 1, 3, 7, 14 days).

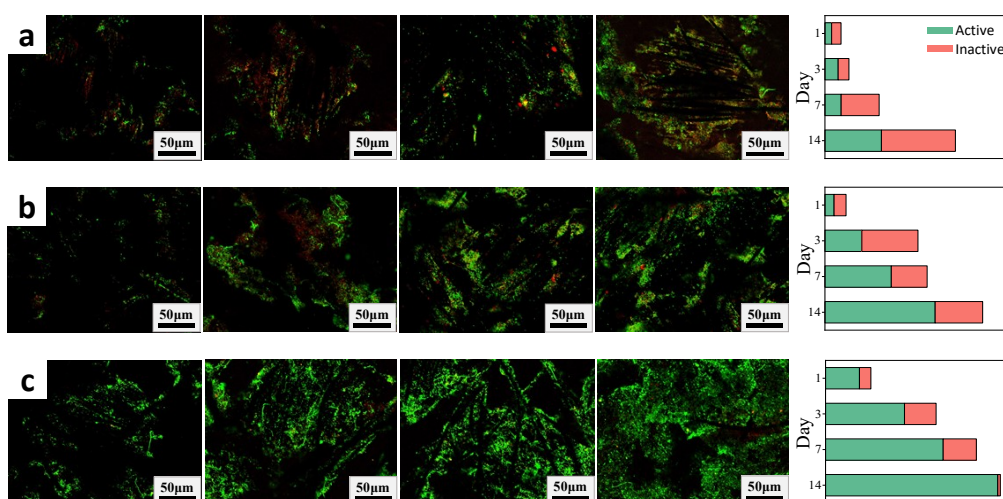

**Fig. S4** CLSM images and fluorescent intensity statistics of biofilm growth on (a) CC, (b) RGO@CC and (c) TP-RGO@CC anodes (Each set of graphs from left to right is 1, 3, 7, 14 days).

## References:

- 1 T. Shii, T. Tanaka, S. Watarumi, Y. Matsuo, Y. Miyata, K. Tamaya, S. Tamaru, K. Tanaka, T. Matsui and I. Kouno, *J. Agric. Food Chem.*, 2011, **59**, 7253–7260.
- 2 M. Ding, H. Yang and S. Xiao, *Journal of Chromatography A*, 1999, **849**, 637–640.
- 3 B. Debnath, D. Haldar and M. K. Purkait, *Chemosphere*, 2022, **300**, 134480.
- 4 S. Guo, M. Kumar Awasthi, Y. Wang and P. Xu, *Bioresource Technology*, 2021, **338**, 125530.
- 5 N. Turkmen, F. Sari and Y. S. Velioglu, *Food Chemistry*, 2006, **99**, 835–841.
